# Supplementary material for: AmrZ is a global transcriptional regulator implicated in iron uptake and environmental adaption in P. fluorescens F113
Source: PubMed Central journal article supplement (PMC3986905; doi:10.1186/1471-2164-15-237), 2014-03-26
Supplement: 1471-2164-15-237-S1.pdf [file 1471-2164-15-237-S1.pdf]

| Locus                      | Gene         | Product                                       | Score   | Fold Enrichment | Motif | Motif p-value |
|----------------------------|--------------|-----------------------------------------------|---------|-----------------|-------|---------------|
| <b>Motility/Chemotaxis</b> |              |                                               |         |                 |       |               |
| PSF113_0118                | <i>cheY8</i> | CheY                                          | 1442,62 | 8,61            | Yes   | 6,16E-09      |
| PSF113_0374                | -            | Methyl-accepting chemotaxis protein           | 3100    | 9,53            | Yes   | 9,41E-07      |
| PSF113_0569                | -            | Methyl-accepting chemotaxis protein           | 1503,09 | 6,94            | Yes   | 1,27E-05      |
| PSF113_0660                | -            | Methyl-accepting chemotaxis protein           | 1501,28 | 6,73            | Yes   | 6,36E-07      |
| PSF113_0740                | <i>fliC2</i> | FliC2                                         | 1414,26 | 6,03            | No    | N.A.          |
| PSF113_0751                | <i>flhD</i>  | FlhD                                          | 3100    | 8,28            | Yes   | 7,26E-07      |
| PSF113_0781                | <i>flgM2</i> | FlgM2                                         | 3100    | 9,06            | Yes   | 1,34E-07      |
| PSF113_0882                | -            | Methyl-accepting chemotaxis protein           | 3047,07 | 9,51            | Yes   | 1,04E-05      |
| PSF113_1675                | -            | Methyl-accepting chemotaxis protein           | 1797,39 | 7,19            | Yes   | 7,22E-08      |
| PSF113_1738                | <i>cheV</i>  | CheV                                          | 3100    | 11,84           | Yes   | 2,10E-07      |
| PSF113_2159                | -            | Methyl-accepting chemotaxis protein           | 3100    | 9,7             | Yes   | 6,36E-07      |
| PSF113_2441                | -            | Methyl-accepting chemotaxis protein           | 3100    | 10,52           | Yes   | 9,91E-08      |
| PSF113_2521                | -            | Methyl-accepting chemotaxis protein           | 3111,39 | 8,68            | Yes   | 3,19E-08      |
| PSF113_2586                | -            | Methyl-accepting chemotaxis protein           | 3100    | 7,61            | Yes   | 3,63E-05      |
| PSF113_2925                | -            | Methyl-accepting chemotaxis protein           | 3100    | 9,78            | Yes   | 3,16E-06      |
| PSF113_3014                | <i>cheA4</i> | CheA                                          | 1085,4  | 6,48            | No    | N.A.          |
| PSF113_3554                | -            | Methyl-accepting chemotaxis protein           | 3100    | 6,57            | Yes   | 4,95E-06      |
| PSF113_3817                | <i>cheY6</i> | CheY                                          | 1246,93 | 6,13            | No    | N.A.          |
| PSF113_4205                | -            | Methyl-accepting chemotaxis protein           | 3130,58 | 8,04            | Yes   | 3,23E-07      |
| PSF113_4460                | <i>flgZ</i>  | FlgZ                                          | 1771,83 | 7,03            | Yes   | 1,89E-05      |
| PSF113_4941                | -            | Methyl-accepting chemotaxis protein           | 3100    | 6,84            | Yes   | 1,98E-06      |
| <b>Iron</b>                |              |                                               |         |                 |       |               |
| PSF113_0933                | <i>fagA</i>  | FagA                                          | 3133,59 | 7,47            | Yes   | 3,63E-05      |
| PSF113_1274                | -            | TonB-dependent hemin , ferrichrome receptor   | 3100    | 12,45           | Yes   | 3,03E-05      |
| PSF113_1322                | -            | Iron-regulated protein A precursor            | 3100    | 10,6            | Yes   | 1,72E-05      |
| PSF113_1749                | <i>pvdS</i>  | PvdS                                          | 3100    | 10,64           | No    | N.A.          |
| PSF113_1750                | <i>pvdL</i>  | PvdL                                          | 3100    | 10,64           | No    | N.A.          |
| PSF113_1837                | <i>pvdD</i>  | PvdD                                          | 1051,57 | 5,99            | No    | N.A.          |
| PSF113_1856                | -            | Outer membrane pyoverdine efflux protein      | 3100    | 5,99            | No    | N.A.          |
| PSF113_2258                | -            | Outer membrane ferripyoverdine receptor       | 2248,65 | 8,34            | Yes   | 1,72E-05      |
| PSF113_2454                | -            | RNA polymerase sigma-70 factor, ECF subfamily | 2270,92 | 8,09            | No    | N.A.          |
| PSF113_2589                | -            | Ferrichrome-iron receptor                     | 3100    | 12,04           | No    | N.A.          |
| PSF113_3151                | -            | Ferrichrome-iron receptor                     | 3100    | 9,6             | Yes   | 7,62E-06      |
| PSF113_3220                | -            | Heme uptake regulator                         | 3100    | 9,9             | No    | N.A.          |
| PSF113_3734                | -            | Ferrichrome-iron receptor                     | 3100    | 11,17           | Yes   | 1,72E-05      |
| PSF113_4045                | -            | Iron-regulated membrane protein               | 3100    | 9,58            | Yes   | 7,26E-05      |
| PSF113_4568                | -            | Bacterioferritin-associated ferredoxin        | 3100    | 10,09           | Yes   | 6,13E-05      |
| PSF113_4569                | -            | Bacterioferritin                              | 3100    | 10,09           | Yes   | 6,13E-05      |
| PSF113_4845                | -            | RNA polymerase sigma-70 factor, ECF subfamily | 2465,83 | 7,17            | No    | N.A.          |
| PSF113_5412                | <i>fiuA</i>  | FiuA                                          | 3100    | 9,78            | No    | N.A.          |
| PSF113_5657                | <i>fbpA</i>  | FbpA                                          | 1075,78 | 8,34            | No    | N.A.          |

| Regulation/Signal transduction |              |                                                                                                |         |       |     |          |  |
|--------------------------------|--------------|------------------------------------------------------------------------------------------------|---------|-------|-----|----------|--|
| PSF113_0361                    | <i>ntrB</i>  | NtrB                                                                                           | 2573,18 | 5,96  | No  | N.A.     |  |
| PSF113_0661                    | -            | Putative two-component response regulator                                                      | 2205,29 | 7,1   | Yes | 1,07E-06 |  |
| PSF113_1200                    | -            | LysR family transcriptional regulator                                                          | 3012,26 | 5,78  | No  | N.A.     |  |
| PSF113_1413                    | <i>algU</i>  | AlgU                                                                                           | 1721,41 | 6,4   | Yes | 4,25E-07 |  |
| PSF113_1768                    | <i>sigX</i>  | SigX                                                                                           | 2211,04 | 6,6   | Yes | 7,26E-05 |  |
| PSF113_2913                    | -            | Transcriptional repressor, LacI family                                                         | 2493,83 | 9,66  | Yes | 4,43E-06 |  |
| PSF113_3565                    | -            | Sensory box histidine kinase                                                                   | 3100    | 10,02 | Yes | 9,91E-08 |  |
| PSF113_3566                    | -            | Signal transduction histidine kinase                                                           | 3100    | 10,02 | Yes | 9,91E-08 |  |
| PSF113_3957                    | <i>staS</i>  | StaS                                                                                           | 1107,42 | 6,2   | Yes | 6,16E-06 |  |
| PSF113_3958                    | <i>rsbU2</i> | RsbU                                                                                           | 1107,42 | 6,2   | Yes | 6,16E-06 |  |
| PSF113_4024                    | -            | Transcriptional regulator, Cro/C1 family                                                       | 1450,05 | 6,33  | No  | N.A.     |  |
| PSF113_4193                    | -            | Two-component response regulator                                                               | 1864,32 | 6,87  | Yes | 9,91E-08 |  |
| PSF113_4470                    | <i>amrZ</i>  | AmrZ                                                                                           | 3100    | 7,08  | Yes | 2,51E-05 |  |
| PSF113_4596                    | <i>cspA3</i> | CspA                                                                                           | 3100    | 9,14  | Yes | 1,21E-06 |  |
| PSF113_4631                    | -            | Sensory box histidine kinase                                                                   | 3100    | 8,65  | Yes | 3,63E-05 |  |
| PSF113_4680                    | -            | Two-component response regulator                                                               | 3100    | 5,96  | Yes | 2,51E-05 |  |
| PSF113_4807                    | -            | Transcriptional regulator containing an amidase domain and an AraC-type DNA-binding HTH domain | 1189,25 | 7,08  | No  | N.A.     |  |
| PSF113_4873                    | -            | PAS PAC sensor protein                                                                         | 2106,22 | 6,66  | No  | N.A.     |  |
| PSF113_5078                    | -            | Autoinducer-binding transcriptional family                                                     | 1283,34 | 6,92  | Yes | 3,23E-07 |  |
| PSF113_5133                    | <i>ladS</i>  | LadS                                                                                           | 3100    | 7,01  | Yes | 1,56E-05 |  |
| PSF113_5263                    | -            | ATP-dependent transcriptional regulator containing adenylate cyclase related domains           | 3100    | 10,18 | Yes | 2,50E-06 |  |
| PSF113_5334                    | <i>vfr</i>   | Vfr                                                                                            | 3052,54 | 7,67  | Yes | 3,97E-05 |  |
| PSF113_5349                    | -            | Putative two-component sensor, near polyamine transporter                                      | 2329,89 | 6,48  | Yes | 5,17E-05 |  |
| PSF113_5523                    | -            | Transcriptional regulator                                                                      | 3157,07 | 5,51  | No  | N.A.     |  |
| PSF113_5782                    | <i>sadB</i>  | SadB                                                                                           | 3100    | 6,5   | Yes | 2,23E-06 |  |
| c-di-GMP                       |              |                                                                                                |         |       |     |          |  |
| PSF113_0499                    | -            | Sensory box-containing diguanylate cyclase                                                     | 2105,9  | 5,56  | Yes | 3,54E-06 |  |
| PSF113_0714                    | <i>yfiR</i>  | YfiR                                                                                           | 3100    | 9,32  | Yes | 1,21E-06 |  |
| PSF113_1982                    | -            | GGDEF domain protein                                                                           | 3100    | 8,43  | Yes | 4,25E-07 |  |
| PSF113_2333                    | -            | Sensory box/GGDEF family protein                                                               | 2773,34 | 8,08  | Yes | 2,44E-07 |  |
| PSF113_3553                    | -            | Metal dependent phosphohydrolase                                                               | 3100    | 6,57  | Yes | 4,95E-06 |  |
| PSF113_4023                    | -            | Diguanylate cyclase phosphodiesterase with PAS PAC sensor                                      | 1450,05 | 6,33  | No  | N.A.     |  |
| PSF113_4038                    | -            | PAS PAC sensor-containing diguanylate cyclase                                                  | 3031,29 | 9,15  | Yes | 1,81E-07 |  |
| PSF113_4360                    | -            | EAL domain/GGDEF domain protein                                                                | 3100    | 11,74 | Yes | 2,44E-07 |  |
| PSF113_4681                    | -            | Diguanylate cyclase phosphodiesterase with PAS PAC sensor                                      | 3100    | 5,96  | Yes | 2,51E-05 |  |
| PSF113_4776                    | -            | GGDEF domain protein                                                                           | 3100    | 6,03  | Yes | 9,41E-07 |  |
| PSF113_4827                    | -            | Diguanylate cyclase/phosphodiesterase (GGDEF & EAL domains) with PAS/PAC sensor(s)             | 2590,03 | 7,34  | No  | N.A.     |  |
| PSF113_5064                    | -            | Sensory box GGDEF domain EAL domain protein                                                    | 3100    | 9,69  | Yes | 3,71E-07 |  |
| PSF113_5392                    | -            | GGDEF domain protein                                                                           | 2400,89 | 8,84  | Yes | 2,81E-07 |  |
| Virulence                      |              |                                                                                                |         |       |     |          |  |
| PSF113_1489                    | -            | Hemolysin activator protein precursor                                                          | 3100    | 12,27 | Yes | 8,47E-08 |  |
| PSF113_1855                    | -            | RHS repeat-associated core domain-containing protein                                           | 3100    | 5,99  | No  | N.A.     |  |

|                  |              |                                                                                                 |         |       |     |          |
|------------------|--------------|-------------------------------------------------------------------------------------------------|---------|-------|-----|----------|
| PSF113_2273      | -            | Reticulocyte binding protein                                                                    | 1598,26 | 6,63  | Yes | 4,43E-06 |
| PSF113_2409      | <i>vgrG</i>  | VgrG                                                                                            | 1429,5  | 6,15  | No  | N.A.     |
| PSF113_2459      | <i>phlD</i>  | PhlD                                                                                            | 1308,69 | 5,53  | Yes | 1,89E-05 |
| PSF113_2737      | -            | Hemolysin-type calcium binding protein                                                          | 1766,48 | 7,11  | Yes | 6,36E-07 |
| PSF113_4636      | <i>secA</i>  | SecA                                                                                            | 3100    | 6,09  | Yes | 2,29E-05 |
| PSF113_5796      | <i>impl</i>  | Impl                                                                                            | 3100    | 8,57  | Yes | 3,71E-07 |
| PSF113_5797      | <i>impA2</i> | ImpA                                                                                            | 3100    | 8,57  | Yes | 3,71E-07 |
| <b>Cell Wall</b> |              |                                                                                                 |         |       |     |          |
| PSF113_0208      | <i>lapA</i>  | LapA                                                                                            | 2119,27 | 6,57  | Yes | 3,71E-07 |
| PSF113_0393      | <i>mdoG</i>  | MdoG                                                                                            | 3100    | 9,42  | Yes | 1,56E-05 |
| PSF113_1188      | <i>rfaZ</i>  | RfaZ                                                                                            | 1005,83 | 6,13  | Yes | 3,96E-06 |
| PSF113_1189      | -            | Chitinase class I family protein                                                                | 1005,83 | 6,13  | Yes | 3,96E-06 |
| PSF113_4752      | <i>algD</i>  | AlgD                                                                                            | 3100    | 9,42  | Yes | 7,26E-05 |
| PSF113_5150      | -            | Muramoyltetrapeptide carboxypeptidase                                                           | 3100    | 6,49  | No  | N.A.     |
| <b>Transport</b> |              |                                                                                                 |         |       |     |          |
| PSF113_0209      | -            | Type I secretion outer membrane family                                                          | 2119,27 | 6,57  | Yes | 3,71E-07 |
| PSF113_0236      | -            | Methionine ABC transporter substrate-binding protein                                            | 3100    | 9,32  | Yes | 6,67E-05 |
| PSF113_0344      | -            | Oxalate/formate antiporter                                                                      | 2868,7  | 7,1   | Yes | 2,50E-06 |
| PSF113_0683      | <i>copP</i>  | CopP                                                                                            | 1029,8  | 5,69  | No  | N.A.     |
| PSF113_0894      | <i>proW2</i> | ProW                                                                                            | 1607,44 | 6,6   | No  | N.A.     |
| PSF113_3190      | -            | CAAX amino terminal protease family protein                                                     | 2260,52 | 8     | Yes | 9,39E-06 |
| PSF113_4094      | -            | Major facilitator family transporter                                                            | 2242,84 | 6,11  | Yes | 1,09E-04 |
| PSF113_5063      | -            | ABC transporter, ATP-binding protein                                                            | 3100    | 9,69  | Yes | 3,71E-07 |
| PSF113_5474      | -            | ABC-type amino acid transport/signal transduction systems, periplasmic component/domain protein | 3100    | 7,68  | Yes | 3,78E-08 |
| <b>Others</b>    |              |                                                                                                 |         |       |     |          |
| PSF113_0079c     | -            | Phage-related replication protein-like protein                                                  | 1469,27 | 5,55  | No  | 5,63E-05 |
| PSF113_0093      | <i>cynT</i>  | CynT                                                                                            | 1796,72 | 5,83  | Yes | 2,29E-05 |
| PSF113_0225      | -            | Microcystin dependent protein                                                                   | 2426,84 | 7,91  | Yes | 2,50E-06 |
| PSF113_0343      | -            | Acetyltransferase                                                                               | 2868,7  | 7,1   | Yes | 1,56E-05 |
| PSF113_0392      | <i>dtd</i>   | Dtd                                                                                             | 3100    | 9,42  | Yes | 2,76E-05 |
| PSF113_0429      | <i>aroB</i>  | AroB                                                                                            | 1984,44 | 6,11  | Yes | 4,87E-07 |
| PSF113_0730      | -            | Glyoxalase family protein                                                                       | 3100    | 9,21  | Yes | N.A.     |
| PSF113_0889      | -            | Flavodoxin nitric oxide synthase                                                                | 3100    | 10,56 | No  | N.A.     |
| PSF113_0895      | <i>prfC</i>  | PrfC                                                                                            | 1607,44 | 6,6   | No  | N.A.     |
| PSF113_0929      | -            | Nitrilase cyanide hydratase and apolipoprotein N-acyltransferase                                | 1214,9  | 6,56  | No  | N.A.     |
| PSF113_0930      | <i>tldD</i>  | TldD                                                                                            | 1214,9  | 6,56  | No  | 2,08E-05 |
| PSF113_0964      | -            | Medium-chain-fatty-acid-CoA ligase                                                              | 1884,91 | 7,84  | Yes | 9,39E-06 |
| PSF113_0976      | -            | Phage protein                                                                                   | 2998,54 | 8,76  | Yes | N.A.     |
| PSF113_1047      | -            | Multicopper oxidase                                                                             | 1633,68 | 7,08  | No  | 1,89E-05 |
| PSF113_1150      | -            | tRNA(Ile)-lysine synthetase                                                                     | 2193,87 | 7,01  | Yes | 1,89E-05 |
| PSF113_1151      | <i>pyrG</i>  | PyrG                                                                                            | 2193,87 | 7,01  | Yes | 2,08E-05 |
| PSF113_1177      | -            | Prophage long tail fiber protein H                                                              | 2784,36 | 5,5   | Yes | 2,08E-05 |
| PSF113_1178      | -            | Prophage tail fiber assembly protein                                                            | 2784,36 | 5,5   | Yes | N.A.     |

|             |              |                                                                            |         |      |     |          |
|-------------|--------------|----------------------------------------------------------------------------|---------|------|-----|----------|
| PSF113_1201 | -            | Ferredoxin--NADP(+) reductase                                              | 3012,26 | 5,78 | No  | 1,18E-04 |
| PSF113_1295 | -            | NAD-dependent aldehyde dehydrogenase                                       | 1509,92 | 5,77 | Yes | 4,25E-07 |
| PSF113_1412 | <i>nadB</i>  | NadB                                                                       | 1721,41 | 6,4  | Yes | 4,95E-06 |
| PSF113_1877 | -            | Propeptide amd peptidase m4                                                | 1873,51 | 6,97 | Yes | N.A.     |
| PSF113_2031 | <i>pcpA</i>  | PcpA                                                                       | 3210,32 | 6,77 | No  | N.A.     |
| PSF113_2126 | -            | Dihydrodipicolinate synthase                                               | 1344,1  | 5,84 | No  | 6,36E-07 |
| PSF113_2158 | <i>nuoA</i>  | NuoA                                                                       | 3100    | 9,7  | Yes | 2,44E-07 |
| PSF113_2332 | -            | Pyrazinamidase nicotinamidase                                              | 2773,34 | 8,08 | Yes | N.A.     |
| PSF113_2569 | -            | Carbon starvation protein A                                                | 1853,85 | 6,08 | No  | 3,16E-06 |
| PSF113_2926 | -            | Aminotransferase class I and II                                            | 3100    | 9,78 | Yes | 4,34E-05 |
| PSF113_2972 | -            | Putative membrane protein                                                  | 2374,87 | 9,1  | Yes | 4,43E-06 |
| PSF113_3038 | -            | NTP pyrophosphohydrolaseincluding oxidative damage repair enzyme           | 3100    | 9,51 | Yes | N.A.     |
| PSF113_3409 | -            | Acyl-CoA dehydrogenase, long-chain specific                                | 1302,86 | 7,26 | No  | 1,15E-05 |
| PSF113_3711 | -            | Valyl-tRNA synthetase                                                      | 3100    | 7,65 | Yes | 6,85E-06 |
| PSF113_3789 | -            | Ferredoxin                                                                 | 1914,84 | 6,92 | Yes | 1,75E-06 |
| PSF113_3853 | -            | Contains type I hydrophobic transmembrane region and ATP/GTP binding motif | 2183,08 | 7,01 | Yes | 1,41E-05 |
| PSF113_3877 | -            | Carboxyphosphoenolpyruvate phosphonmutase                                  | 2040,09 | 9,89 | Yes | 6,85E-06 |
| PSF113_3889 | -            | Zinc carboxypeptidase domain protein                                       | 3100    | 9,76 | Yes | 3,23E-07 |
| PSF113_3891 | -            | Catalase                                                                   | 1622,51 | 5,57 | Yes | N.A.     |
| PSF113_3918 | <i>tig</i>   | Tig                                                                        | 2702,4  | 6,91 | No  | N.A.     |
| PSF113_3922 | <i>folD</i>  | FoID                                                                       | 2702,4  | 6,91 | No  | 2,44E-07 |
| PSF113_3975 | <i>mfd</i>   | Mfd                                                                        | 1445,57 | 5,86 | Yes | N.A.     |
| PSF113_4083 | -            | Sterol desaturase                                                          | 1771,44 | 7,37 | No  | 1,09E-04 |
| PSF113_4096 | -            | Enoyl-CoA hydratase/isomerase family protein                               | 2242,84 | 6,11 | Yes | 3,97E-05 |
| PSF113_4101 | -            | 3-ketoacyl-CoA thiolase, Acetyl-CoA acetyltransferase                      | 2040,81 | 7,09 | Yes | 3,97E-05 |
| PSF113_4102 | -            | Cytochrome c, mono- and diheme variant                                     | 2040,81 | 7,09 | Yes | 1,27E-04 |
| PSF113_4137 | <i>moaA2</i> | MoaA                                                                       | 2910,49 | 6,18 | Yes | 3,63E-05 |
| PSF113_4154 | -            | Haloacid dehalogenase-like hydrolase                                       | 1283,28 | 6,23 | Yes | 3,63E-05 |
| PSF113_4155 | -            | Ribosomal large subunit pseudouridine synthase C                           | 1283,28 | 6,23 | Yes | 9,91E-08 |
| PSF113_4192 | -            | Flp fap pilin component                                                    | 1864,32 | 6,87 | Yes | N.A.     |
| PSF113_4272 | -            | Chorismate synthase                                                        | 1322,14 | 6,71 | No  | N.A.     |
| PSF113_4273 | -            | Hydrolase, alpha/beta fold family                                          | 1322,14 | 6,71 | No  | 2,23E-06 |
| PSF113_4280 | -            | DNA mismatch repair protein                                                | 3100    | 7,51 | Yes | 4,43E-06 |
| PSF113_4410 | -            | Cobyrinic acid-diamide adenosyltransferase                                 | 3100    | 8,62 | Yes | 1,37E-06 |
| PSF113_4529 | -            | PHP-like protein                                                           | 3100    | 7,51 | Yes | 1,21E-06 |
| PSF113_4595 | -            | Aminomethyltransferase (glycine cleavage system T protein)                 | 3100    | 9,14 | Yes | N.A.     |
| PSF113_4731 | -            | Ketosteroid isomerase-related protein                                      | 3100    | 8,34 | No  | N.A.     |
| PSF113_4806 | -            | Butyryl-CoA dehydrogenase                                                  | 1189,25 | 7,08 | No  | N.A.     |
| PSF113_4872 | <i>yqcA</i>  | YqcA                                                                       | 2106,22 | 6,66 | No  | N.A.     |
| PSF113_4932 | <i>prs</i>   | Prs                                                                        | 3181,2  | 5,84 | No  | 1,98E-06 |
| PSF113_4940 | -            | Fosmidomycin resistance protein                                            | 3100    | 6,84 | Yes | 3,54E-06 |
| PSF113_4950 | -            | Putative exported protein                                                  | 3100    | 9,72 | Yes | 5,53E-06 |
| PSF113_4978 | -            | Pentapeptide repeat-containing protein                                     | 3100    | 7,85 | Yes | N.A.     |

|                |             |                                                       |         |       |     |          |
|----------------|-------------|-------------------------------------------------------|---------|-------|-----|----------|
| PSF113_5071    | -           | Carbon starvation protein A                           | 3100    | 5,73  | No  | 1,56E-05 |
| PSF113_5134    | <i>thiD</i> | ThiD                                                  | 3100    | 7,01  | Yes | 3,97E-05 |
| PSF113_5333    | -           | OsmC/Ohr family protein                               | 3052,54 | 7,67  | Yes | 3,78E-08 |
| PSF113_5475    | -           | Acetyltransferase                                     | 3100    | 7,68  | Yes | N.A.     |
| PSF113_5686    | <i>hemB</i> | HemB                                                  | 1573,37 | 6,67  | No  | N.A.     |
| PSF113_5687    | -           | DedA family protein                                   | 1573,37 | 6,67  | No  | N.A.     |
| <b>Unknown</b> |             |                                                       |         |       |     |          |
| PSF113_0226    | -           | Hypothetical protein                                  | 2426,84 | 7,91  | Yes | 2,29E-05 |
| PSF113_0370    | -           | Putative membrane protein                             | 1833,27 | 7,18  | No  | N.A.     |
| PSF113_0375    | -           | Putative lipoprotein                                  | 3100    | 9,53  | Yes | 9,41E-07 |
| PSF113_0580    | -           | Hypothetical protein                                  | 3100    | 9,97  | Yes | 3,23E-07 |
| PSF113_0662    | -           | Hypothetical protein                                  | 2205,29 | 7,1   | Yes | 1,07E-06 |
| PSF113_0682    | -           | Hypothetical protein                                  | 1029,8  | 5,69  | No  | N.A.     |
| PSF113_0876    | -           | Hypothetical protein                                  | 3100    | 9,07  | Yes | 1,37E-06 |
| PSF113_0877    | -           | Hypothetical protein                                  | 3100    | 9,07  | Yes | 1,37E-06 |
| PSF113_0916    | -           | Hypothetical protein                                  | 3100    | 11,58 | Yes | 6,36E-07 |
| PSF113_0975    | -           | Hypothetical protein                                  | 2998,54 | 8,76  | Yes | 9,39E-06 |
| PSF113_1104    | -           | Hypothetical protein                                  | 3100    | 11,33 | Yes | 1,34E-07 |
| PSF113_1294    | -           | Hypothetical protein                                  | 1509,92 | 5,77  | Yes | 1,18E-04 |
| PSF113_1304    | -           | Putative perforin-like protein 2                      | 1458,9  | 7,25  | Yes | 5,17E-05 |
| PSF113_1488    | -           | Hypothetical protein                                  | 3100    | 12,27 | Yes | 8,47E-08 |
| PSF113_1729    | -           | Putative lipoprotein                                  | 2172,68 | 5,84  | Yes | 5,63E-05 |
| PSF113_1737    | -           | Hypothetical protein                                  | 3100    | 11,84 | Yes | 2,10E-07 |
| PSF113_1876    | -           | Hypothetical protein                                  | 1873,51 | 6,97  | Yes | 4,95E-06 |
| PSF113_1941    | -           | Putative membrane protein                             | 2177,97 | 7,77  | Yes | 6,18E-08 |
| PSF113_1942    | -           | Frg domain protein                                    | 2177,97 | 7,77  | Yes | 6,18E-08 |
| PSF113_1981    | -           | Hypothetical protein                                  | 3100    | 8,43  | Yes | 4,25E-07 |
| PSF113_2129    | -           | Hypothetical protein                                  | 3100    | 10,79 | Yes | 4,87E-07 |
| PSF113_2272    | -           | Hypothetical protein                                  | 1598,26 | 6,63  | Yes | 4,43E-06 |
| PSF113_2448    | -           | Hypothetical protein                                  | 3100    | 10,61 | Yes | 1,89E-05 |
| PSF113_2522    | -           | Hypothetical protein                                  | 3111,39 | 8,68  | Yes | 3,19E-08 |
| PSF113_2587    | -           | Putative membrane protein                             | 3100    | 7,61  | Yes | 3,63E-05 |
| PSF113_2952    | -           | Hypothetical protein                                  | 3100    | 9,36  | Yes | 1,41E-05 |
| PSF113_3013    | -           | Putative cell wall-associated hydrolase               | 1085,4  | 6,48  | No  | N.A.     |
| PSF113_3039    | -           | Hypothetical protein                                  | 3100    | 9,51  | Yes | 4,43E-06 |
| PSF113_3171    | -           | Hypothetical protein                                  | 1806,81 | 5,98  | Yes | 4,95E-06 |
| PSF113_3258    | -           | Hypothetical protein                                  | 3100    | 8,34  | Yes | 3,03E-05 |
| PSF113_3296    | -           | Hypothetical protein                                  | 2741,95 | 6,51  | Yes | 2,29E-05 |
| PSF113_3652    | -           | Putative exported protein                             | 3100    | 9,49  | Yes | 1,89E-05 |
| PSF113_4106    | -           | Putative superfamily II DNA/RNA helicase, SNF2 family | 1495,88 | 6,54  | Yes | 6,16E-06 |
| PSF113_4204    | -           | Putative membrane protein                             | 1725,3  | 6,64  | Yes | 3,71E-07 |
| PSF113_4318    | -           | Hypothetical protein                                  | 2229,39 | 8,06  | Yes | 3,03E-05 |
| PSF113_4319    | -           | Hypothetical protein                                  | 2229,39 | 8,06  | Yes | 3,03E-05 |

|             |   |                                              |         |       |     |          |
|-------------|---|----------------------------------------------|---------|-------|-----|----------|
| PSF113_4411 | - | Hypothetical protein                         | 3100    | 8,62  | Yes | 4,43E-06 |
| PSF113_4637 | - | Hypothetical protein                         | 3100    | 6,09  | Yes | 2,29E-05 |
| PSF113_5053 | - | Hypothetical protein                         | 1244,93 | 7,43  | Yes | 1,41E-05 |
| PSF113_5194 | - | Putative membrane protein                    | 3100    | 8,26  | Yes | 9,41E-07 |
| PSF113_5264 | - | Hypothetical protein                         | 3100    | 10,18 | Yes | 2,50E-06 |
| PSF113_5350 | - | Hypothetical protein                         | 2329,89 | 6,48  | Yes | 5,17E-05 |
| PSF113_5423 | - | Hypothetical protein                         | 2575,11 | 7,8   | Yes | 9,28E-05 |
| PSF113_5424 | - | Hypothetical protein                         | 2575,11 | 7,8   | Yes | 9,28E-05 |
| PSF113_5504 | - | Putative membrane protein                    | 1812,58 | 6,89  | Yes | 2,51E-05 |
| PSF113_5783 | - | Putative superfamily II DNA and RNA helicase | 3100    | 6,5   | Yes | 2,23E-06 |
