# Supplementary material for: AmrZ is a global transcriptional regulator implicated in iron uptake and environmental adaption in P. fluorescens F113
Source: PubMed Central journal article supplement (PMC3986905; doi:10.1186/1471-2164-15-237), 2014-03-26
Supplement: 1471-2164-15-237-S2.pdf [file 1471-2164-15-237-S2.pdf]

| <b>Locus ID</b>                   | <b>CHIP (5'-3')</b>                                      | <b>RT-qPCR (5'-3')</b>                                  |
|-----------------------------------|----------------------------------------------------------|---------------------------------------------------------|
| PSF113_1559 ( <i>fleQ</i> )       | Fw: AGGCGTCTACAGGCATGACAA<br>Rv: TTAAAGATCACCGCCAAGTCG   |                                                         |
| PSF113_4752 ( <i>algD</i> )       | Fw: TGCACTATGACCGCTGAACAC<br>Rv: GCGACATCTACGCCAACTACG   |                                                         |
| PSF113_4470 ( <i>amrZ</i> )       | Fw: CATTCCGTTATCCGCCAGAC<br>Rv: TCATGCCTCAAAATTGCCAGA    |                                                         |
| PSF113_0714 ( <i>yfiR</i> )       | Fw: GGGTTGATGCTGGAGTTGGAG<br>Rv: CCAGCGAGACAGCGTGTATG    |                                                         |
| PSF113_4360                       | Fw: ATGGTGATGCTCGTCGGAGT<br>Rv: CTGTCGTGGTCATGGCAATCT    | Fw: GCGCATCGTGGGTTATGAAG<br>Rv: CCAGTTCCAATTCGCTGAGG    |
| PSF113_5392                       | Fw: CGATGGCGTTTGTTCAGTCAG<br>Rv: GAGGGGACGGTTTTCTTAGGG   | Fw: CGACGCTGGTGTGTTGCT<br>Rv: CCAGGAGGAAGTAGGCGATGT     |
| PSF113_1274                       | Fw: GATAGGCTCCGCTGATTCGTC<br>Rv: GCAAGAAACCGGCAAGTAAGG   | Fw: CCACCTGAAAAAGCCCTGGA<br>Rv: GCGCTGATGGTCACTTGTG     |
| PSF113_1322                       | Fw: TACCGAAGGCGGCAATCTC<br>Rv: ATCATGGCGAACATCCTGCTT     | Fw: GGCGAAGGCAAAGACAAGG<br>Rv: TAGACGATGTCGGCGTAGTGC    |
| PSF113_1749 ( <i>pvdS</i> )       | Fw: TCGCACCTGCTGTGGATACT<br>Rv: CTAATTTGGCGCTCGATGTGT    | Fw: CGCCAGAAACCTCCCATATCA<br>Rv: GCGGTACATCTCGAAGGCATAG |
| PSF113_1750 ( <i>pvdL</i> )       | Fw: TCGCACCTGCTGTGGATACT<br>Rv: CTAATTTGGCGCTCGATGTGT    | Fw: AGGCAGGAAACCCCATGAC<br>Rv: CGCGATAACTCAACACCACAC    |
| PSF113_4569                       | Fw: TTCAAGGAACCGGACTCAATGT<br>Rv: GCGCATTTACGAGTGTCAAACC | Fw: GAGATGCTTGAGTGCACCTG<br>Rv: CGATGTGCTCTTCTCGGATT    |
| PSF113_0750-0751 ( <i>flhDC</i> ) | Fw: GGAACATCCGCCAAGTACGA<br>Rv: TCACATACTCGACCCTGCTCAA   | Fw: TGGAACAGGTCGGTCATCAAG<br>Rv: GCGTGAGAGTGAGCAACGAA   |
| PSF113_3554                       | Fw: ATAGTTTCGCGGCCATCACTT<br>Rv: TTGCCTGTCTTTCACCTTCA    | Fw: GTGTGGAGCCTGCGTTTATTG<br>Rv: CCTCACCAATCCTTCATCAG   |
| PSF113_4205                       | Fw: ACTGGCTACGGATCAATGTGG<br>Rv: AAGATGCTGGCGTCGGAATAA   | Fw: GGATTTGTCTGGTGCTGCT<br>Rv: GAGGGCCGACATCTGTTTCA     |
| PSF113_4460 ( <i>flgZ</i> )       | Fw: GCCAGTCGATCCTGATGCAA<br>Rv: ATCATCCGCGTTTGAGGCA      | Fw: CCGCGAGACCAACTCCATT<br>Rv: GTCAGTGGACCCTTGCCATC     |
| PSF113_0118                       | Fw: TGCCATCAGTAAAAGCGGTATG<br>Rv: CCAGGTCACGAATGAACGAAG  | Fw: TGCTTCGTTTCATTCGTGACCT<br>Rv: GGCATTTCCAATCGCACA    |
| PSF113_5133 ( <i>ladS</i> )       | Fw: TGACACTTATTGGGGCTGCTTC<br>Rv: GTTGCCTTGGTGAGGTCGTAA  | Fw: CTCTCGATCAGCGTTCTGGTT<br>Rv: CGCATCGGGTAGGTACAAGTC  |
| PSF113_5263                       | Fw: ACAGTCCAGAGCGGTGTCAGT<br>Rv: GTTTGGTCGCAAGTCCATGTC   | Fw: ATGGACTTGCGACCAAACACC<br>Rv: GCAGCCCTTCAACGACAC     |
| PSF113_5333                       | Fw: CTTTCATCGCCAAGACTCCACT<br>Rv: ATGCTGGTCGGTCAGGTCTC   | Fw: AAGCCATGTTCTCGGTGAGT<br>Rv: CCCAGCAAGAGCATTTCATC    |
| PSF113_5334 ( <i>vfr</i> )        | Fw: CTTTCATCGCCAAGACTCCACT<br>Rv: ATGCTGGTCGGTCAGGTCTC   | Fw: GCCATCCAGCCAAACACAAC<br>Rv: ACCGTCGTCATCTTCTATCAGG  |
| PSF113_2409 ( <i>vgrG</i> )       | Fw: CCAGAATGGAAACGCCAATAA<br>Rv: CGGTGAGTGATAGCGTGGTGT   | Fw: GACAGCAACACCACGCTATCA<br>Rv: CGTTGAGGATGTGCGAACC    |
| <i>dif</i> region                 | Fw: TTGAAGCCAATCCCATCCTCT<br>Rv: TTCGTTCTTCTTGTGTCG      |                                                         |
| PSF113_4631                       |                                                          | Fw: TGTTGTTGACCACTGTCTGCT<br>Rv: CGGAGATCAGGCTTGATTG    |
| PSF113_5797 ( <i>impA</i> )       |                                                          | Fw: GTGGATGTGCCTTGTGCTC<br>Rv: CATGCTACGTTCCGGCTGAC     |
| PSF113_1837 ( <i>pvdD</i> )       |                                                          | Fw: GACAAGGAGGGCGTGGAGTT                                |

| <b>Locus ID</b>              | <b>ChIP (5'-3')</b> | <b>RT-qPCR (5'-3')</b>                                                               |
|------------------------------|---------------------|--------------------------------------------------------------------------------------|
| PSF113_0889                  |                     | Rv: CAGGTTGTAAGCACCGCTGTC<br>Fw: CGACCGTGTCTACCTGCTGA                                |
| PSF113_2589                  |                     | Rv: ACTGCGCCTTGAAGCTCTTGT<br>Fw: TGTTTCAGAAATGGGCATCCAG                              |
| PSF113_3220                  |                     | Rv: TCCTCGCTCAGCTCATACTCG<br>Fw: TCCGCCAACGATCTGTCTCTA                               |
| PSF113_4045                  |                     | Rv: ACGTATCCTGGGCAAGGTCTG<br>Fw: CTTCGGTTTGGTCCTGAGCAT                               |
| PSF113_4845                  |                     | Rv: GGGTTTCTGGCTACGCTTGAG<br>Fw: GAAGAGGAACGGGCAATCATC                               |
| PSF113_0933                  |                     | Rv: TGACCGTCGCCAATGAAATAC<br>Fw: CACTGCGCGACCTCGAACAAC                               |
| PSF113_1554 ( <i>fliC</i> )  |                     | Rv: TACTCATCGGGAGATCCTTGC<br>Fw: TTCCGATGCTCTGTCCACTTC                               |
| PSF113_0740 ( <i>fliC2</i> ) |                     | Rv: GATACCGTCGTTGGCGTTCTT<br>Fw: GACCAGACCATCACCATCCAG<br>Rv: AGCGTTGTGTCATAGCCGTTTC |

#### **AmrZ fusions (5'-3')<sup>a</sup>**

|          |                                                            |
|----------|------------------------------------------------------------|
| HAamrZF  | ATGTCT <u>ATCCATACGATGTTCCAGATTATGCTCGCCCATTGAAACAGGCA</u> |
| amrZextR | TCAGGTCGCGTCTGCGG                                          |
| amrZextF | ATGCGCCCATTGAAACAGG                                        |
| amrZHAR  | TTA <u>AGCATAATCTGGAACATCGTATGGATAGGTCGCGTCTGCGGCCA</u>    |

<sup>a</sup>HA sequence is underlined
